# Supplementary material for: Factors associated with polypharmacy and excessive polypharmacy in older people with intellectual disability differ from the general population: a cross-sectional observational nationwide study
Source: PubMed Central journal article supplement — BMJ Open. 2016 Apr 1;6(4):e010505. doi: 10.1136/bmjopen-2015-010505 (PMC4823458; doi:10.1136/bmjopen-2015-010505), 2016-04-01
Supplement: bmjopen-2015-010505supp_tables.pdf [file bmjopen-2015-010505supp_tables.pdf]

Suppl Table 1 Comparison with NIDD and IDS-TILDA

|                        | <i>NIDD</i> |          | <i>IDS-TILDA</i> |          |
|------------------------|-------------|----------|------------------|----------|
|                        | %           | <i>N</i> | %                | <i>N</i> |
| <i>Level of ID*</i>    |             |          |                  |          |
| <i>Mild</i>            | 28.2        | 2341     | 23.9             | 166      |
| <i>Moderate</i>        | 45.2        | 3756     | 46.5             | 323      |
| <i>Severe/Profound</i> | 26.6        | 2209     | 29.5             | 205      |
| <i>Gender</i>          |             |          |                  |          |
| <i>Male</i>            | 50.8        | 4305     | 44.8             | 330      |
| <i>Female</i>          | 49.2        | 4165     | 55.2             | 406      |
| <i>Age at Wave 1</i>   |             |          |                  |          |
| <i>40-49</i>           | 46.8        | 3970     | 36.1             | 266      |
| <i>50-54</i>           | 41.1        | 3482     | 45.7             | 336      |
| <i>65+</i>             | 12.0        | 1018     | 18.2             | 134      |

Suppl Table 2: p-value for Z-test of proportions

|                        | <b>IDS-TILDA at<br/>Wave 1 vs<br/>NIDD 2008</b> |
|------------------------|-------------------------------------------------|
| <i>Mild</i>            | <b>0.0132</b>                                   |
| <i>Moderate</i>        | 0.5094                                          |
| <i>Severe/Profound</i> | 0.1067                                          |
| <i>Male</i>            | <b>0.009</b>                                    |
| <i>Female</i>          |                                                 |
| <i>40-49</i>           | <b>&lt;0.001</b>                                |
| <i>50-54</i>           | <b>0.0175</b>                                   |
| <i>65+</i>             | <b>0.0025</b>                                   |
